# Supplementary material for: A new glacier thickness and bed map for Svalbard
Source: Copernicus journal article supplement (doi:10.5194/egusphere-2024-1525), 2024-05-31
Supplement: Supplementary file [file egusphere-2024-1525-AC1-supplement.pdf]

## **Response to RC1:**

Referee comments in **red**

Author comments in **green**

The title directly sets the stage for the overarching objective, i.e., to forward a new map of glacier ice thickness for Svalbard. For this purpose, the authors employ a state-of-the-art method that builds on surface observations of geometry and velocity as well as model estimates of surface mass balance. Calibration target is the abundant record of thickness measurements. For the actual mapping, the authors distinguish three glacier types using specific treatment for active surges. Apart from the actual thickness distribution, the authors ultimately report a total ice volume of  $6\,800 \pm 238 \text{ km}^3$ , which is within the range of previous estimates. Admittedly I am very excited about this new mapping effort on Svalbard. The reason is that all previous attempts have their specific weaknesses. The manuscript is well written and strikes with clearness and high-quality illustrations. Altogether it is very easy to follow. When I read the manuscript, one question got stuck in my head. Should this new map replace previous efforts (new standard) and if yes, what are the key arguments for the quality increase. In my view, the manuscript fails to explain this. Apart from that, I see some methodological aspects requiring further justification or adaptation (e.g., glacier classes, calibration, multi-model approach, uncertainty). Overall, I remain very positive about this manuscript and I recommend that the editor should continue to consider it for publication in *The Cryosphere* after my main concerns below have been alleviated.

We thank the reviewer for the constructive and detailed feedback, which have helped us a lot to improve the manuscript!

### **MAJOR COMMENTS**

#### **GLACIER CATEGORIES**

The criteria for defining several glacier classes are well presented. You distinguish in terms of area (threshold  $100 \text{ km}^2$ ), termination type (land/marine) as well as observed surge activity in 2017/18. Yet later in the manuscript (L116-117), you diffuse these categories again by joining well-connected ice geometries and with it combining different classes. So a land terminating glacier smaller than  $100 \text{ km}^2$  that is connected to a larger ice-body will be treated differently than its stand-alone homologue. The same is true for surge-type glaciers. All surge-type glaciers are embedded in larger icefields (Fig.1c). Does actually any glacier remain in class 3? If yes and they fall into an icefield, what is done at its internal boundary? In summary, the classification appears somewhat confusing to me. I am sure you find a more consistent strategy.

Thanks for bringing this up. It was indeed confusing the way it was described in the original manuscript. We still stand behind our original division into the three glacier classes, but we realize the statement about the large ice systems (L116-117) was incorrect / incomplete. Non-surging small glaciers ( $<100 \text{ km}^2$ ) and large glaciers ( $>100 \text{ km}^2$ ) that are part of large ice systems (ice caps) are all modeled with PISM to avoid jumps at ice divides. The same however does not apply to actively surging glaciers which are not modeled with PISM but rather with the perfect plasticity assumption, even when they are part of a large ice system. To avoid thickness jumps between surging and non-surging glaciers the simulations with

PISM included also the surging glaciers in the model grid, but held the surface height and thickness fixed for those glaciers while performing the inversion for the non-surging glaciers. This allowed for mass fluxes through the ice divides between surging and non-surging glaciers and avoided thickness jumps within the large ice systems.

We have rephrased L116-117 as follows: “*One nuance to the three groups above is that all (small) glaciers in group 1) that are part of / connected to larger ice caps are modeled with PISM. This is to avoid thickness jumps at the ice divides. Furthermore, to avoid thickness jumps within ice caps between PISM-modeled and surging glaciers, experiments with PISM also include the surging glaciers as static entities with thicknesses based on the perfect-plasticity assumption.*”

### METHODOLOGICAL MIX

I understand that you sell the glacier classification, and with it the specific methods per class, as a strength of your approach. The Parallel Ice Sheet Model (PISM) is used for the larger glacier compounds (class 2), the Instructed Glacier Model (IGM) for the smaller land-terminating glaciers (class 1) whereas surge type glaciers (class 3) are treated with the perfect plasticity approach (requiring minimum input). While it is clear that surge type glaciers need to be treated differently, I do not get my head around it, why two approaches are necessary for the other two classes (1 and 2). You argue that IGM comprises higher-order dynamics necessary for the smaller glaciers. Yet, higher-order dynamics would also be preferential for the larger ice bodies. Some of these are marine terminating and show significant flow speeds near the ice front. I do not see the advantage of using two models especially as the glacier class definition is a bit diffuse (see above).

We agree with the reviewer that ideally all glaciers should be modeled with the best possible physics. Following that logic it would have made sense to model also the large tidewater glaciers using IGM. There are however several reasons for us to choose PISM instead for the large glaciers. PISM is an ice flow model that has previously been successfully applied to model glaciers and ice caps that exhibit both sliding and non-sliding flow (by combining the shallow shelf and shallow ice approximations) and calving. IGM has only recently been released and has so far primarily been applied to (small) land-terminating glaciers. Only recently (after we did our experiments with IGM) progress has been made by IGM developers toward modeling tidewater glaciers, e.g. by adding a term that describes the horizontal stress at a calving front (see e.g. the preprint by Jouvét et al. 2024, doi:10.31223/X5T99C). In literature, there is so far only one example of IGM being tested on an synthetic ice shelf (Jouvét and Cordonnier, 2023; doi:10.1017/jog.2023.73), using the SSA approximation (i.e. not higher-order), and no published results exist yet for grounded tidewater glaciers. Main developer of IGM, Guillaume Jouvét, recommended us during a meeting in June this year to perform tests with IGM on tidewater glaciers but was unsure about its performance and potential bugs as no such tests have been performed yet. As we are also curious about how well IGM would do we have now performed a test with IGM for all large glaciers around Kongsfjorden (and beyond) in northwestern Svalbard. To allow for direct comparison with the PISM results, we have, as we did with PISM, set a velocity threshold ( $25 \text{ m a}^{-1}$ ) to distinguish areas where the sliding coefficient is locally optimized ( $>25 \text{ m a}^{-1}$ ) or where instead a constant viscosity is used ( $<25 \text{ m a}^{-1}$ ). Furthermore, exactly the same gridded input datasets (velocity, apparent mass balance, surface height, glacier outlines and initial thickness) are used, and simulations are done at the same model

resolution (500 m). Finally, as for the PISM experiment, we calibrate optimal parameters for  $\Theta$  and a mass balance correction factor. The figure below shows a comparison of the thicknesses estimated with PISM and IGM. When comparing both maps with available thickness data, we find a slightly better performance with PISM (RMSE = 86 m) than with IGM (RMSE = 92 m) for these glaciers.

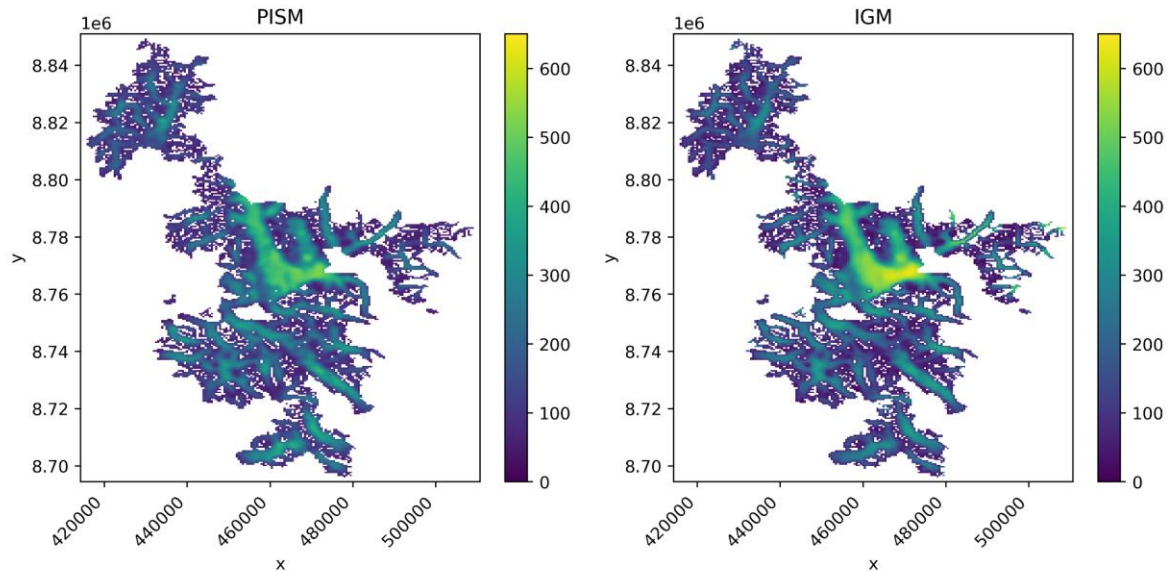

Based on the above we have decided that currently it is not worth it yet to model all glaciers with IGM, although this may change in the near future with ongoing progress with IGM. We hypothesize that the reason for the slightly worse performance of IGM on large glaciers (despite the better underlying physics) is that IGM is a machine learning model which does not produce the exact output that a conventional higher order model would produce. It is notably faster, and may through internal learning come close to the results of a higher-order model, but it is not an exact copy. Jouvett and Cordonnier (2023) further noted that IGM experiences a loss of accuracy with increasing domain size, which is another confirmation that IGMs output is not a replica of regular higher-order model results. Other differences between PISM and IGM are in the numerical implementation of e.g. mass fluxes and boundary conditions, which could potentially explain some of the differences even though we are not well enough introduced into both models to give definite answers.

This is more a response to a comment by the other reviewer, but we share it here too as it is related. In general, we are not fully convinced that we should strive for more consistency between the methods for small and large glaciers. We in fact want the methods to be separately optimized for both glacier classes, as it ultimately lowers the thickness errors. What also plays a role here is that there is a physical limit to the degree of detail in the bed that still gives a surface expression (e.g. Gudmundsson et al. 2008). This typically implies that bed features smaller than the ice thickness can not be recovered through inversion. As a result of this we can expect to recover more detailed beds for small glaciers than for large glaciers, and want to modify inversion parameters accordingly.

We have added the following in Sect. 4.2: “*This confirms that the use of IGM for small glaciers leads to better agreement with thickness measurements. One reason may be the higher-order physics behind IGM, which helps to resolve small-scale ice flow and bed*

*features better than with a model like PISM which is based on shallowness assumptions. IGM is under constant development, and to date no extensive tests have been performed yet on grounded tide-water glaciers. Using IGM and the same input datasets and model assumptions as with PISM we performed first tests on a selection of tidewater glaciers in Svalbard showing slightly worse performance (more details in Response to Reviewer 1). This may lie in the machine-learning character of IGM, which can only approximate the results of conventional ice flow models that directly solve the stress equations. It is also worth noting that IGM experiences a loss of accuracy with increasing domain size (Jouvet and Cordonnier, 2023), further underscoring that IGMs output is not a replica of regular higher-order model results.”*

The following was added in Sect. 4.3: *“Arguably, using different ice flow models, spatial resolution, and individual parameter calibration per glacier class some consistency between the methods is lost. However, advantageously we achieve a lower misfit with thickness observations. We further note that there is a limit to the degree of detail in the bed that can be recovered from inversion, which scales with the ice thickness (Gudmundsson et al. 2008). Hence, smaller-scale bed details can theoretically be recovered for smaller (thinner) glaciers than for larger (thicker) glaciers. This supports our use of different resolutions and inverse method calibration for different glacier sizes.”*

Last but not least, you need to say something about the IGM capabilities of inferring ice thickness itself without integration into a transient assimilation. Please add this to the discussion.

We are not sure what the reviewer refers to here. After all, what we are doing is using IGM to infer ice thicknesses without directly assimilating thickness observations, and we show both validation statistics and plots in several places in the manuscript. Our best guess is that the reviewer asks for mentioning that IGM comes with a built-in inversion scheme (which we do not use), and that this should be mentioned in the manuscript. We have therefore added in Sect. 3.2: *“The method is closely aligned with Frank and van Pelt (2024). Note, therefore, that while we use IGM as a forward model, we do not use IGM’s built-in inversion as described by Jouvet (2022) which, in contrast to our method, assimilates thickness observations and relies on cost function minimization.”*

## PROGRESS & DISCUSSION

As much as I like it that a new thickness map of the Svalbard ice cover is presented, I wonder about the improvements with respect to existing products. You can either show that the quality of the input data is higher or that your method is more sound. Alternatively, you simply show some performance measures by comparing the different thickness products and leave the decision to the reader. I am not sure what is the best way forward in your case. The most practical is to extend your discussion by additional analysis. I suggest that you simply add previous results to some existing figures (Figs. 5, 6 and 7). This extension will help readers to better assess your new thickness product. In case you find further arguments to promote your map product, please stress this prominently throughout the text and certainly in the abstract. One last thought that got stuck in my head: the two previous estimates (Fürst & Millan) seem to differ in volume and spatial distribution. Your map reproduces the volume of one approach and the pattern of the other. Why is that? Could this give an argument?

Thanks for this comment. We agree the strengths of our approach could be emphasized more. In the original manuscript, we did already quantify how well our study as well as Millan et al. (2022) performed against thickness observations. This information was (is) in Table 2 and showed that our study yields comparable results for small glaciers and a marked improvement for large glaciers and surging glaciers compared to Millan et al. Such a comparison is unfortunately not possible with the results of Fürst et al. (2018) who use an approach that more or less imprints the local thickness observations in their final map.

We do not think it is worth including a comparison (with Millan et al.) in all figures, but do add the scatter plots of modeled vs observed ice thickness also for Millan et al. to Figure 7 (panels c and d). These figures show that the larger MAE for glacier classes 2) and 3) in Millan et al. are a result of a general larger spread and more outliers, especially for larger thicknesses. For glaciers of class 1), i.e. the small ones, Millan et al. tends to underestimate large thickness and overestimate small thicknesses, which is a sign that their thickness distributions are too smooth. We have added sentences on this to Sect. 4.2.

Furthermore, based a related minor comment below, we have now updated the map of Fürst et al. to a newer version (v1.1) that was uploaded to the Norwegian Polar Institute data portal some months after the 2018 study was published (<https://doi.org/10.21334/npolar.2018.57fd0db4>). As described on the website, the new map applies “averaging in terms of ice viscosity” and has a ~20% higher volume than the original product. The updated Fürst et al. thickness and difference map in Fig. 8c and 8d show that now the volume and average thickness are larger than in our product (7213 vs 6800 km<sup>3</sup>), and that local differences are much smaller than with the original Fürst et al. (2018) product (v1.0), which showed the much smaller thicknesses compared to our study primarily for the smaller glaciers and low-elevation valleys. We have revised Sect. 4.2 to briefly describe these new results. An independent thickness observation dataset would be needed to compare performance of our study with the product by Fürst et al. which to date is unfortunately not possible. It is noteworthy though that the Fürst et al. products could be seen as an “interpolation method” as the observations are imprinted in the map and mass conservation and viscosity tuning are applied to generate thicknesses in between observations. Our study is less informed by the observations (only to constrain global parameters) which we argue leads to a map that may be more consistent in space (in terms of spatial detail/roughness and uncertainty) and has the advantage that it can be used as a numerically stable spin up state for prognostic modeling. We have added some discussion on this to Sect. 4.2.

## INPUT DATA

I would appreciate a little regional overview of all input data in Sect. 2. Many of these data sets have global coverage and it is difficult to assess their quality on Svalbard. You should comment on that briefly. Admittedly, you have Fig. 1 but nothing is said about uncertainties/quality. Possibly some of them are better suite than what was used for previous Svalbard maps.

Admittedly, the input data description was rather short and lacked a discussion of how data were selected. We have added the following to Section 2 to clarify the selection process:



*“The main criteria for the selection of input datasets were: 1) performance in previous comparisons (when available), 2) the time-stamp, since data from a similar period were preferred (see also Sect. 4.3) , and 3) smoothness / spatial noise and missing data. To support the selection of velocity and surface height change datasets we additionally performed tests forcing the inverse method with different products (Millan et al. 2022, Friedl et al. 2021, and NASA ITS\_LIVE for velocity; and Morris et al. 2020 and Hugonnet et al. 2021 for surface height change) revealing best performance against thickness data when using Millan et al. (2022) and Hugonnet et al. (2021) respectively. For glacier outlines, we used version 6.0 of the RGI outlines (instead of the newer version 7.0) based on the compatibility of the outline dataset with frontal ablation estimates in Kochtitzky et al. (2022). Differences between the RGI versions 6.0 and 7.0 are in the delineation of individual glaciers, the combined area and the total outline are the same in both versions (see [http://www.glims.org/rgi\\_user\\_guide/regions/rgi07.html](http://www.glims.org/rgi_user_guide/regions/rgi07.html)).”*

## CALIBRATION

If I understand your manuscript correctly, you calibrate several parameters (spatially uniform) for both the IGM and the PISM inversion. IGM and PISM only differ in the a-priori choice of the rate factor and the sliding coefficient as well as in the SMB correction strategy. Actual calibration parameters are  $\beta$ ,  $\Theta$ ,  $\tau$  and  $\alpha_{min}$ . These mostly relate to the initial guess for ice thickness and the iterative inversion procedure. I cannot understand why you would need different initial guesses for these two models with  $\tau_{PISM} = 0.52\text{kPa}$  vs.  $\tau_{IGM} = 100\text{kPa}$  and  $\alpha_{PISM} = 0.014$  vs.  $\alpha_{IGM} = 0.04$ . Isn't the perfect plasticity approach only calibrated once?

We understand this is a bit confusing. In general, we argue that because of the different geometries and dynamics of small and large (tidewater) glaciers, there is no reason to assume that the same parameter values would apply.

The reason to use different parameters values for constructing the initial bed is that for IGM the performance (i.e. the agreement with thickness data) was found to be better when using higher values for the two parameters after doing a set of perturbation experiments. For the experiments with PISM it was important to have a smooth transition of the initial and final bed at ice divides between non-surging and surging glaciers (e.g. in ice caps). This was found to be best possible when using the  $\tau$  and  $\alpha$  values for surging glaciers to generate the initial bed for the non-surging glaciers. We have added the following to Sect. 3.2 to clarify that the selection of parameter values for IGM-modeled glaciers (class 1) was based on sensitivity tests:

*“The initial thickness field is obtained using a perfect plasticity approach (eq. (2)) with  $\tau = 100\text{ kPa}$  and  $\alpha_{min} = 0.04$ . These perfect plasticity parameter values were selected based on sensitivity tests with IGM, and hence deviate from the ones used to generate the initial bed for glaciers in class 2 and the final bed for glaciers in class 3.”*

Second, I am puzzled why the iterative inversion method requires so different values:  $\beta_{PISM} = 0.25$  vs.  $\beta_{IGM} = 1$  and  $\Theta_{PISM} = 0.4$  vs.  $\Theta_{IGM} = 0.15$  (also no friction update in IGM). Can you please explain? These calibration differences cast doubts on keeping a consistent map product while applying two glacier-system models.

$\beta$  needs to be chosen small enough to avoid too fast corrections of the bed, but not too small to avoid excessive number of iterations. In the end, a too small beta does not impact the final result much (if at all), it will just take more time (iterations) to get there. So we argue that different  $\beta$  values do not affect consistency between the thickness products. We are unsure why a different beta works best with the two models, we hypothesize it is related to the different spatial resolution and time-stepping in the two models.

$\Theta$  controls the magnitude of surface updates, which are needed for 'stability' of the inversion (mostly to avoid endless bed adjustments that do not lead to any resulting surface expression). A higher value of  $\Theta$  generally leads to a bit smoother bed. In both approaches  $\Theta$  was varied and optimum values were determined for which the thickness error was smallest. This information was missing for IGM and has now been added in the revision. Also, we should note that we mistakenly wrote  $\Theta_{IGM} = 0.15$  whereas its actual value was 0.25. This has now been corrected.

We have added the following to Sect. 3.2: *“Whereas  $\beta$  affects the magnitude of bed corrections and number of iterations needed, it hardly (if at all) influences the final bed; a too high value may however cause instabilities and values in PISM and IGM have been chosen accordingly. As in PISM, the value for  $\Theta$  in IGM has been optimized by minimizing discrepancies with thickness observations.”*

#### MINOR COMMENTS

L91 Please clarify why you chose the perfect plasticity approach for surge-type glaciers. In my view, your main reason is the temporal consistency of the input data. The method by itself is not more adequate for such glaciers. I am not sure if all readers immediately get this.

Indeed, the (lacking) temporal consistency of the input data is the main reason for using the perfect plasticity method. We rephrase as follows:

*“Surging glaciers were modeled separately with a perfect-plasticity method instead, as time-stamp mismatches of the input datasets (e.g. DEM from ~2010 and velocity map from 2017-2018) did not allow for accurate inversion using the Frank et al. (2023) method for glaciers with strong short-term changes in geometry and flow dynamics.”*

L107-108 It is not very clear why you limit your surge-type class to the years 2017-2018. Koch et al. (2023) present surging glaciers for a longer time period. Why did you refine your selection? Your DEM dates back to 2010. So many other surges are imprinted. Do you see a problem from that even using the perfect plasticity.

Good point. The difference in timestamps of the input datasets made it difficult to decide which date of period to use to select actively surging glaciers. Our judgment was that the velocity dataset is affected most abruptly by active surging and would cause most uncertainty in the (iterative) inversion, hence we decided to select the collection years for the velocity dataset (2017-2018) as the period to select active surges. With this strategy we hope to have selected the most problematic glaciers, but arguably also glaciers that surged between 2010-2016 are prone to additional uncertainty when modeled with iterative inverse methods. It is however not clear whether the perfect plasticity method would have improved the results for those glaciers. Unfortunately, to our knowledge no complete records exist for

surges between 2010-2016, so this is hard to test. The selection of surging glaciers based on the timestamp of the velocity dataset is described in Sect. 3.3.

L126 From my understanding, the term yield stress relates to when deformation becomes possible whereas the term sliding law normally relates basal velocities to general basal stress conditions. Please check this terminology and be specific about any assumptions.

L136 In the in-line equation here, you relate two stresses to each other, namely  $\tau_d$  and  $\tau_c$ . Velocity is the scaling factor. In this definition,  $\tau_d$  and  $\tau_c$  cannot both be stresses. I would consider one of them a basal friction coefficient. I therefore would not use the symbol  $\tau$ .

Thanks for this remark. We use the same terminology as in Bueler and Brown (2009) and in the PISM manual (<https://www.pism.io/docs/manual/modeling-choices/subglacier/basal-strength.html>).

There was a mistake in the in-line equation, a term describing a threshold velocity was missing in the equation ( $u_{\text{thres}} = 1 \text{ m s}^{-1}$ ). This is now corrected, and with that it is also more clear that the yield stress is indeed a stress and not a coefficient.

L166 Here, you present the first calibrated parameters.  $\Theta$  represents the strength of the surface update. I am very surprised by its magnitude of 40%. This means that if you have to adjust the thickness at one location, 40% of this change will be imprinted in the surface. This is a lot. I wonder how much your modelled surface then deviates from the observed one after convergence. Please clarify.

Indeed, large surface corrections are applied in locations where the bed deviates much from the initial bed. We forgot to describe in the original manuscript that in PISM this is remedied by first calculating a map of cumulative surface corrections; this map is then smoothed and subtracted from the modeled surface. In PISM this is done once per experiment (halfway, i.e. after 400 iterations), and assures that only minor biases remain in the surface height by the end of the run. This information is now added in Sect. 3.1:

*“To avoid major surface height anomalies relative to the DEM, e.g. when starting from a strongly biased initial bed, we apply a one-time correction to the surface height map after 400 iterations. During this correction, a map of surface height deviations relative to the DEM is computed and smoothed with a Gaussian filter (using four standard deviations for the Gaussian kernel); the resulting map is subtracted from the surface height map.”*

In IGM, no such additional adjustments to the surface height are applied. There is less need because of the lower  $\Theta$  value that was used, and because a best initial bed was selected by testing initial beds with different parameter settings for the perfect plasticity assumption (see also earlier comment).

L205 & L226 I am happy to see such small threshold values here. Please give them in degrees.

We do not see the benefit of using degrees here. We argue that it only adds to confusion since the 0.001 steps would no longer be equally large.

L219 time periods --> time stamps



Corrected.

L254-256 Your uncertainty estimate of the mean thickness of 205 m is  $\pm 7$  m . As you say, this is about  $\pm 3.5\%$ . Measurement errors of thickness observations typically exceed 10-20% and therefore strongly challenge your estimate. These measurement errors are not considered in your uncertainty analysis. Moreover, I do not get my head around your argument (L255) that the standard deviation of modelled vs. observed thickness values must be divided again by the number of glaciers with observations (i.e.,  $\sqrt{169}$ ) Please explain better or remove this division.

We would like to highlight that the uncertainty estimate (3.5 m) applies to the *mean ice thickness* for all of Svalbard (205 m). It is the mean thickness and its error that are relevant for the ice volume calculation. The fact that the mean thickness bias (i.e. volume error) is zero for 169 glaciers across Svalbard greatly reduces the volume uncertainty for all ice in Svalbard. The volume uncertainty would have been markedly higher when fewer glaciers were observed. Furthermore, the thickness error at a random location in Svalbard is much larger, e.g. in Table 2 it can be found that it is 75.5 m for glaciers in class 2) and 3) and 50.1 m for glaciers in class 1. In other words, local errors that occur at individual sites in Svalbard to a large extent balance / average out at the Svalbard-wide scale. The following has been added to Sect. 3.4:

*“Please note that the relative error of the volume and mean thickness is much smaller than the local (point) uncertainty of modeled thicknesses (the latter is quantified in Sect. 4.2).”*

and in Sect. 4.3:

*“The large and well-distributed thickness observations dataset available for Svalbard used for model calibration, including data from 169 glaciers, helped to reduce the Svalbard-wide volume uncertainty (estimated at 3.5 %). Whereas the RMSE of Svalbard mean glacier thickness is only 3.5 m as a result of averaging and calibration, the local (point) thickness error is considerably larger (50.1 m for class 1 and 75.5 m for class 2 and 3, Tab. 2).”*

The reasoning behind the division with  $\sqrt{169}=13$  is that if we would have calibrated the model (i.e. removed the bias) using data from only one arbitrary glacier out of the 169 observed glaciers, we would introduce a bias in the mean thickness after calibration that is 68% of the time between -45 and + 45 m (depending on which glacier we chose to calibrate the model parameters against). This range of biases narrows if we select more than one glacier for calibrating the model, and, following the same logic as is used to calculate a standard error of a mean, it can be found that dividing by the square-root of the number of samples gives the correct the mean thickness error when selecting all 169 glaciers. E.g. in case numerous random selections of 5 observed glaciers were used to calibrate the model (i.e. to remove the thickness bias for those 5 glaciers), the standard deviation of the mean thickness would reduce to  $\pm 45$  divided by  $\sqrt{5}$ . We hope this clarifies it a bit and understand it can be rather confusing. In the manuscript we have revised the description of this in Sect. 3.4 by adding:

*“The range of biases narrows if we select more than one glacier for calibrating the model, and, following the same logic as is used to calculate a standard error of a mean, it can be found that dividing by the square-root of the number of samples is required to calculate the remaining standard deviation for larger sets of glaciers used for calibration.”*

L270 For the land- and marine terminating glaciers, you report mean thickness values of 42 m and 162 m, respectively. How can you reconcile this value with the archipelago-wide average of 205 m. I certainly miss something here ;o)

The mean thickness values are correct. The values for land and marine terminating glaciers are *median* values whereas for all glaciers we report the *mean* thickness. Given the skewed distribution with relatively many (very) small glaciers with small thickness, the median values are much lower than the mean.

## FIGURES

Fig. 1 I like this figure very much. In panel (c) you indicate the locations of all surge-type glaciers. They all belong to larger ice-fields. So are they now modelled with PISM or the perfect plasticity approach. In the latter case, how do you ensure that you do not get internal fringe lines in the thickness field.

See earlier response.

Fig. 2 Could you add the reference run with  $M_{\text{corr}} = 0.4 \text{ m w.e. yr}^{-1}$  and  $\Theta = 0.4$ .

Please note that  $M_{\text{corr}} = 0.4$  and  $\Theta = 0.4$  were the reference (best) values that are used for producing the final thickness and bed estimates with PISM (as shown in Fig. 3). Figure 2 shows differences relative to this (best) reference run. We have changed the caption of Fig. 2 to make this more clear and changed a sentence in Sect. 3.1.

Fig. 4 In panel (a) and (b), the ice thickness decreases towards the calving fronts of marine-terminating glaciers. Why is that? On Hansbreen, you could directly compare to a dense survey grid included in GlaThiDa.

Most tidewater glaciers thin towards their fronts. This is because of mass continuity and increased flow rates closer to the calving front, which lead to less thick ice. This is for example obvious on Kronebreen (e.g. Lindbäck et al. 2018), and Hansbreen too (e.g. Oerlemans et al. 2011). Indeed, we could have included a data comparison in Figure 4, (e.g. using colored dots at observation sites), but this would make the figure much harder to read. Since the purpose of the figure is mainly to show local examples of how the 100-m resolution IGM results and 500-m PISM & perfect-plasticity results are merged, we prefer to stick with the current format.

Furthermore, since the Fürst dataset (locally) assimilates all thickness observations, the spatial comparison in Figure 8b and 8d could be used to e.g. look at performance of our thickness product on densely observed glaciers like Kronebreen and Hansbreen.

Fig. 4 & 5 Please extend these figures by values from the existing thickness maps. It might also help in evaluating & promoting your results.

We think that with the additions to Fig. 7, the table with statistics (Table 2), and the (updated) spatial comparison maps in Fig. 8 there is sufficient comparison with previous studies.

Fig. 7 How does this distribution look like for Millan? It would be good to add for reference. It might also help in evaluating & promoting your results.

We are thankful for this suggestion and include two additional panels in Fig. 7 to also validate Millan's product against thickness observations.

We have further added the following in Sect. 4.2: "*Similar scatter plots comparing thicknesses by Millan et al. (2022) with observations (Fig. 7c-d) show that the larger errors for glaciers in classes 2 and 3 (Table 2) are a result of a general larger spread in the Millan et al. (2022) dataset, primarily for large thicknesses. For the small glaciers (class 1) Millan et al. (2022) show an underestimation of large thicknesses and an overestimation of small thicknesses, indicating that the Millan et al. (2022) thickness product is smoother than reality.*"

Fig. 8 Please use the updated thickness map (v1.1) from Fürst et al. (2018) at [data.npolar.no](http://data.npolar.no).

Thanks for this suggestion. We now include v1.1 and have updated the related discussion in Sect. 4.2. We now more extensively discuss the different nature of the Fürst et al. map, which imprints the observations, and added discussion on advantages and drawbacks of both methods. We also mention the large volume difference (~20%) of version 1.0 and 1.1. The volume estimate for version 1.1 has been added to the Introduction.

## TABLES

Table 1 Please indicate the version of GlaThiDa.

We used version 3.1.0, and now include this information in Table 1.

Table 2 Please use the numbering you introduced for the glacier classes (1-3).

Good point, we have revised this here and throughout the manuscript.

## CODE AVAILABILITY

Is the inversion method available via an open repository?

The current scripts we used for the inversion are currently not easy to use by others as they lack commenting and the (Python) code is not optimally structured yet. We hence prefer to wait with publishing them until they are more readable. Nevertheless, we believe the Methods section and references therein are sufficiently detailed to allow reproduction of our results. Both ice flow models (IGM and PISM) are open-access, as well as all input datasets. Furthermore, the generated thickness and bed maps are available in a repository (see Data Availability).
